# Supplementary material for: Bioinspired High-Performance Bilayer, pH-Responsive Hydrogel with Superior Adhesive Property
Source: MDPI journal article supplement (doi:10.3390/polym14204425), 2022-10-19
Supplement: s1 [file s1]

Article

# Bioinspired High-Performance Bilayer, pH-Responsive Hydrogel with Superior Adhesive Property

Shulan Jiang <sup>1,\*</sup> and Li Xia <sup>2</sup>

<sup>1</sup> School of Mechanical Engineering and Electronic Information, China University of Geosciences (Wuhan),  
Wuhan 430074, China

<sup>2</sup> Tribology Research Institute, School of Mechanical Engineering, Southwest Jiaotong University, Chengdu 610031, China

\* Correspondence: jiangshulan@cug.edu.cn

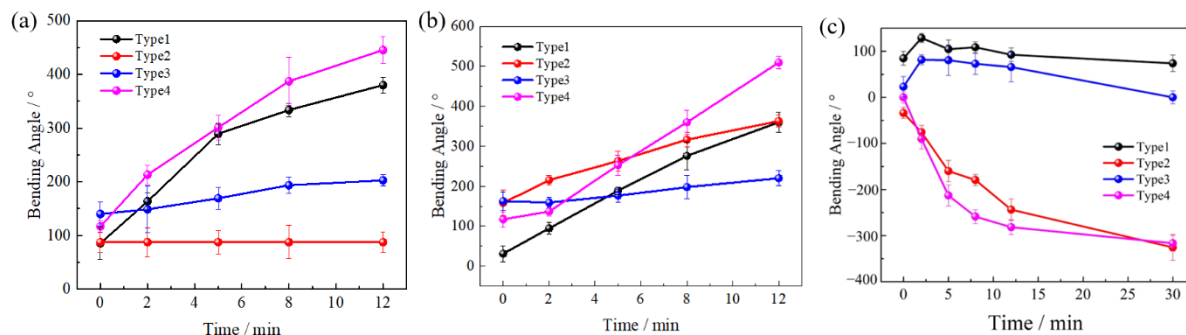

**Figure S1.** The relationship between bending angle and time of different bilayer hydrogel placed in the solution at pH 1(a), DI water (b) and at pH 13(c).

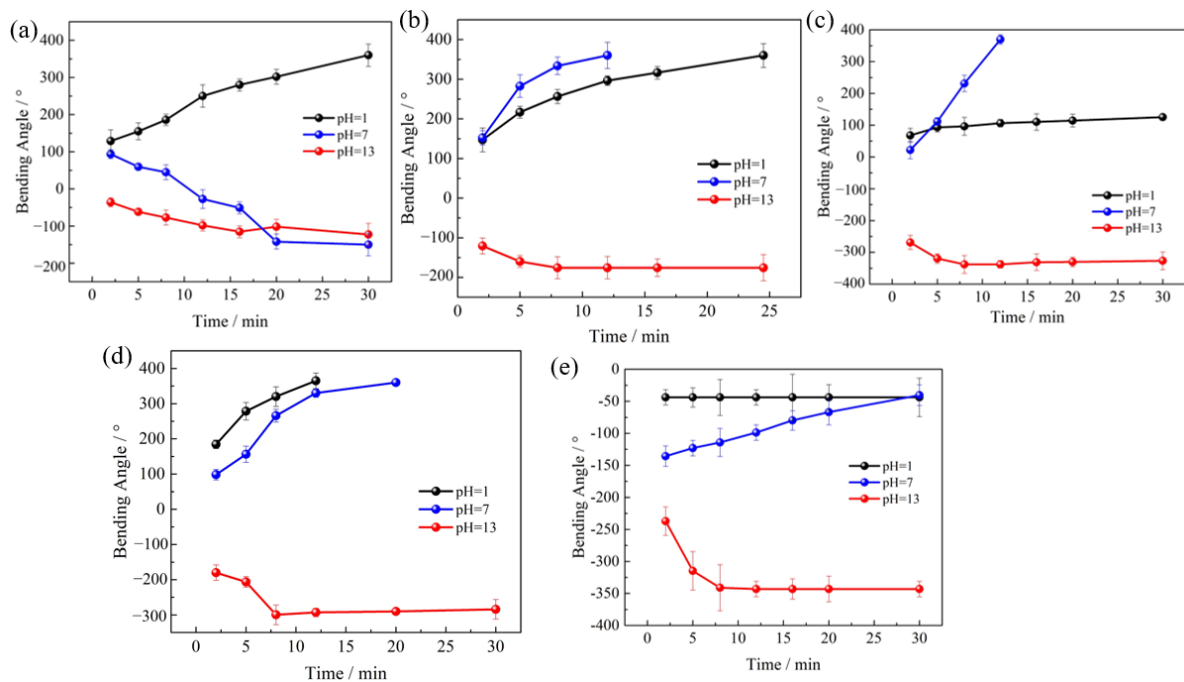

**Figure S2.** The relationship between bending angle and time of the P(AAm-AAc-3-AAPBA)/PAAm bilayer structures with different 3-AAPBA contents ((a) 0wt%, (b) 2.5wt%, (c) 5wt%, (d) 7.5wt%, (e) 10wt%) at different pH.
